# Supplementary material
Source: HighWire-hosted journal article supplement (https://genome.cshlp.org/content/suppl/2012/08/22/22.9.1626)
Supplement: SupplementaryTable20.xlsx [file SupplementaryTable20.xlsx]

## Sheet: Sheet1
sample title	GEO ID
Caltech_RnaSeq_GM12878_2x75_200	GSM958728
Caltech_RnaSeq_K562_2x75_200	GSM958729
Caltech_RnaSeq_HepG2_2x75_200	GSM958732
Caltech_RnaSeq_H1-hESC_2x75_200	GSM958733
Caltech_RnaSeq_HUVEC_2x75_200	GSM958734
Caltech_RnaSeq_HeLa-S3_2x75_200	GSM958735
Caltech_RnaSeq_NHEK_2x75_200	GSM958736
Caltech_RnaSeq_HSMM_2x75_200	GSM958744
Caltech_RnaSeq_MCF-7_2x75_200	GSM958745
Caltech_RnaSeq_NHLF_2x75_200	GSM958746
Caltech_RnaSeq_GM12891_2x75_200	GSM958747
Caltech_RnaSeq_GM12892_2x75_200	GSM958748
Caltech_RnaSeq_HCT-116_2x75_200	GSM958749
Caltech_RnaSeq_LHCN-M2_2x75_200	GSM958750
Caltech_RnaSeq_LHCN-M2_2x75_200_DIFF_7d	GSM958751
